# Supplementary material
Source: publisher figshare collection journal article supplement (https://acs.figshare.com/ndownloader/files/8983885)
Supplement: Supplementary file 1 [file 8983885]

data_4'-methoxymonocillin IV 
_audit_creation_date              2014-06-17
_audit_creation_method
;
Olex2 1.2
(compiled 2014.03.20 svn.r2914 for OlexSys, GUI svn.r4816)
;
_publ_contact_author_address      ?
_publ_contact_author_email        ?
_publ_contact_author_name         ''
_publ_contact_author_phone        ?
_publ_section_references
;
Dolomanov, O.V., Bourhis, L.J., Gildea, R.J, Howard, J.A.K. & Puschmann, H.
 (2009), J. Appl. Cryst. 42, 339-341.

Sheldrick, G.M. (2008). Acta Cryst. A64, 112-122.
;
_chemical_name_common             ?
_chemical_name_systematic
;
 ? 
;
_chemical_formula_moiety          'C19 H24 O6'
_chemical_formula_sum             'C19 H24 O6'
_chemical_formula_weight          348.38
_chemical_absolute_configuration  ad
_chemical_melting_point           ?
loop_
  _atom_type_symbol
  _atom_type_description
  _atom_type_scat_dispersion_real
  _atom_type_scat_dispersion_imag
  _atom_type_scat_source
 'C' 'C' 0.0181 0.0091 'International Tables Vol C Tables 4.2.6.8 and 6.1.1.4'
 'H' 'H' 0.0000 0.0000 'International Tables Vol C Tables 4.2.6.8 and 6.1.1.4'
 'O' 'O' 0.0492 0.0322 'International Tables Vol C Tables 4.2.6.8 and 6.1.1.4'

_space_group_crystal_system       'monoclinic'
_space_group_IT_number            4
_space_group_name_H-M_alt         'P 1 21 1'
_space_group_name_Hall            'P 2yb'
loop_
  _space_group_symop_id
  _space_group_symop_operation_xyz
 1 'x, y, z'
 2 '-x, y+1/2, -z'

_cell_length_a                    9.25830(10)
_cell_length_b                    8.03346(8)
_cell_length_c                    12.00210(14)
_cell_angle_alpha                 90.00
_cell_angle_beta                  103.3025(11)
_cell_angle_gamma                 90.00
_cell_volume                      868.719(17)
_cell_formula_units_Z             2
_cell_measurement_reflns_used     13811
_cell_measurement_temperature     293(2)
_cell_measurement_theta_max       71.5899
_cell_measurement_theta_min       3.7813
_exptl_absorpt_coefficient_mu     0.817
_exptl_absorpt_correction_T_max   1.00000
_exptl_absorpt_correction_T_min   0.52966
_exptl_absorpt_correction_type    multi-scan
_exptl_absorpt_process_details
;
CrysAlisPro, Agilent Technologies,
Version 1.171.35.21 (release 20-01-2012 CrysAlis171 .NET)
(compiled Jan 23 2012,18:06:46)
Empirical absorption correction using spherical harmonics,
 implemented in SCALE3 ABSPACK scaling algorithm.
;
_exptl_crystal_colour             ?
_exptl_crystal_density_diffrn     1.332
_exptl_crystal_density_meas       ?
_exptl_crystal_density_method     'not measured'
_exptl_crystal_description        ?
_exptl_crystal_F_000              372
_exptl_crystal_size_max           0.5
_exptl_crystal_size_mid           0.1
_exptl_crystal_size_min           0.05
_exptl_special_details
;
 ? 
;
_diffrn_reflns_av_R_equivalents   0.0414
_diffrn_reflns_av_unetI/netI      0.0234
_diffrn_reflns_limit_h_max        11
_diffrn_reflns_limit_h_min        -11
_diffrn_reflns_limit_k_max        9
_diffrn_reflns_limit_k_min        -9
_diffrn_reflns_limit_l_max        14
_diffrn_reflns_limit_l_min        -14
_diffrn_reflns_number             16749
_diffrn_reflns_theta_full         71.73
_diffrn_reflns_theta_max          71.73
_diffrn_reflns_theta_min          3.78
_diffrn_ambient_temperature       293(2)
_diffrn_detector_area_resol_mean  8.2417
_diffrn_measured_fraction_theta_full 0.996
_diffrn_measured_fraction_theta_max 0.996
_diffrn_measurement_device_type   'Xcalibur, Onyx, Nova'
_diffrn_measurement_method        '\w scans'
_diffrn_orient_matrix_UB_11       -0.1403427000
_diffrn_orient_matrix_UB_12       0.0803698000
_diffrn_orient_matrix_UB_13       -0.0747486000
_diffrn_orient_matrix_UB_21       -0.0611047000
_diffrn_orient_matrix_UB_22       -0.1739323000
_diffrn_orient_matrix_UB_23       -0.0394614000
_diffrn_orient_matrix_UB_31       -0.0761134000
_diffrn_orient_matrix_UB_32       -0.0084407000
_diffrn_orient_matrix_UB_33       0.1012802000
_diffrn_radiation_monochromator   mirror
_diffrn_radiation_type            CuK\a
_diffrn_radiation_wavelength      1.54184
_diffrn_source                    'Nova (Cu) X-ray Source'
_diffrn_standards_decay_%         ?
_diffrn_standards_interval_count  ?
_diffrn_standards_interval_time   ?
_diffrn_standards_number          ?
_reflns_number_gt                 3320
_reflns_number_total              3382
_reflns_odcompleteness_completeness 99.08
_reflns_odcompleteness_iscentric  1
_reflns_odcompleteness_theta      71.98
_reflns_threshold_expression      >2sigma(I)
_computing_cell_refinement
;
CrysAlisPro, Agilent Technologies,
Version 1.171.35.21 (release 20-01-2012 CrysAlis171 .NET)
(compiled Jan 23 2012,18:06:46)
;
_computing_data_collection
;
CrysAlisPro, Agilent Technologies,
Version 1.171.35.21 (release 20-01-2012 CrysAlis171 .NET)
(compiled Jan 23 2012,18:06:46)
;
_computing_data_reduction
;
CrysAlisPro, Agilent Technologies,
Version 1.171.35.21 (release 20-01-2012 CrysAlis171 .NET)
(compiled Jan 23 2012,18:06:46)
;
_computing_molecular_graphics     'Olex2 (Dolomanov et al., 2009)'
_computing_publication_material   'Olex2 (Dolomanov et al., 2009)'
_computing_structure_refinement   'XL (Sheldrick, 2008)'
_computing_structure_solution     'XS (Sheldrick, 2008)'
_refine_diff_density_max          0.147
_refine_diff_density_min          -0.155
_refine_diff_density_rms          0.035
_refine_ls_abs_structure_details  'Flack H D (1983), Acta Cryst. A39, 876-881'
_refine_ls_abs_structure_Flack    0.04(12)
_refine_ls_extinction_coef        ?
_refine_ls_extinction_method      none
_refine_ls_goodness_of_fit_ref    1.046
_refine_ls_hydrogen_treatment     constr
_refine_ls_matrix_type            full
_refine_ls_number_parameters      230
_refine_ls_number_reflns          3382
_refine_ls_number_restraints      1
_refine_ls_R_factor_all           0.0290
_refine_ls_R_factor_gt            0.0283
_refine_ls_restrained_S_all       1.046
_refine_ls_shift/su_max           0.000
_refine_ls_shift/su_mean          0.000
_refine_ls_structure_factor_coef  Fsqd
_refine_ls_weighting_details
'calc w=1/[\s^2^(Fo^2^)+(0.0417P)^2^+0.1582P] where P=(Fo^2^+2Fc^2^)/3'
_refine_ls_weighting_scheme       calc
_refine_ls_wR_factor_gt           0.0719
_refine_ls_wR_factor_ref          0.0726
_refine_special_details
;
 Refinement of F^2^ against ALL reflections.  The weighted R-factor wR and 
 goodness of fit S are based on F^2^, conventional R-factors R are based 
 on F, with F set to zero for negative F^2^. The threshold expression of 
 F^2^ > 2sigma(F^2^) is used only for calculating R-factors(gt) etc. and is 
 not relevant to the choice of reflections for refinement.  R-factors based 
 on F^2^ are statistically about twice as large as those based on F, and R- 
 factors based on ALL data will be even larger. 
;
_olex2_refinement_description
;
1. Fixed Uiso
 At 1.2 times of:
  All C(H) groups, All C(H,H) groups
 At 1.5 times of:
  All C(H,H,H) groups, All O(H) groups
2.a Ternary CH refined with riding coordinates:
 C16(H16), C22(H22)
2.b Secondary CH2 refined with riding coordinates:
 C13(H13A,H13B), C15(H15A,H15B), C19(H19A,H19B), C20(H20A,H20B), C21(H21A,H21B)
2.c Aromatic/amide H refined with riding coordinates:
 C9(H9), C12(H12), C17(H17), C23(H23)
2.d Idealised Me refined as rotating group:
 C24(H24A,H24B,H24C), C1A(H1AA,H1AB,H1AC)
2.e Idealised tetrahedral OH refined as rotating group:
 O2(H2), O4(H4)
;
_atom_sites_solution_hydrogens    geom
_atom_sites_solution_primary      direct
_atom_sites_solution_secondary    difmap
loop_
  _atom_site_label
  _atom_site_type_symbol
  _atom_site_fract_x
  _atom_site_fract_y
  _atom_site_fract_z
  _atom_site_U_iso_or_equiv
  _atom_site_adp_type
  _atom_site_occupancy
  _atom_site_calc_flag
  _atom_site_disorder_assembly
  _atom_site_disorder_group
  _atom_site_refinement_flags_posn
 O1 O -0.15018(10) -0.34785(12) -0.37312(8) 0.0187(2) Uani 1 d . . .
 O2 O 0.30140(11) -0.43935(12) -0.31744(9) 0.0236(2) Uani 1 d . . .
 H2 H 0.2316 -0.5040 -0.3369 0.035 Uiso 1 calc . . GR
 O3 O 0.03196(10) -0.53116(12) -0.37456(8) 0.0224(2) Uani 1 d . . .
 O4 O 0.41187(10) 0.13104(12) -0.25376(9) 0.0228(2) Uani 1 d . . .
 H4 H 0.4959 0.0961 -0.2509 0.034 Uiso 1 calc . . GR
 O5 O -0.32499(10) 0.00479(13) -0.29858(8) 0.0216(2) Uani 1 d . . .
 C6 C 0.09541(14) -0.24540(16) -0.33989(11) 0.0166(3) Uani 1 d . . .
 O7 O -0.17802(11) 0.09257(12) -0.02014(9) 0.0243(2) Uani 1 d . . .
 C8 C -0.00819(14) -0.38687(17) -0.36434(11) 0.0180(3) Uani 1 d . . .
 C9 C 0.35641(14) -0.15917(18) -0.28631(11) 0.0191(3) Uani 1 d . . .
 H9 H 0.4567 -0.1867 -0.2694 0.023 Uiso 1 calc . . R
 C10 C 0.05356(14) -0.07451(17) -0.33678(10) 0.0171(3) Uani 1 d . . .
 C11 C 0.24932(15) -0.28298(17) -0.31590(11) 0.0185(3) Uani 1 d . . .
 C12 C 0.16199(15) 0.04683(17) -0.30867(11) 0.0183(3) Uani 1 d . . .
 H12 H 0.1342 0.1579 -0.3073 0.022 Uiso 1 calc . . R
 C13 C -0.11666(13) -0.08945(17) -0.15579(11) 0.0182(3) Uani 1 d . . .
 H13A H -0.0254 -0.0268 -0.1307 0.022 Uiso 1 calc . . R
 H13B H -0.0901 -0.2056 -0.1603 0.022 Uiso 1 calc . . R
 C14 C -0.19369(14) -0.03083(15) -0.27383(11) 0.0165(3) Uani 1 d . . .
 C15 C -0.10530(14) -0.01309(17) -0.36522(11) 0.0180(3) Uani 1 d . . .
 H15A H -0.1582 -0.0719 -0.4329 0.022 Uiso 1 calc . . R
 H15B H -0.1043 0.1038 -0.3853 0.022 Uiso 1 calc . . R
 C16 C -0.26048(14) -0.48258(17) -0.40423(11) 0.0200(3) Uani 1 d . . .
 H16 H -0.2319 -0.5541 -0.4617 0.024 Uiso 1 calc . . R
 C17 C -0.31244(15) -0.49540(17) -0.20383(11) 0.0207(3) Uani 1 d . . .
 H17 H -0.4112 -0.4634 -0.2149 0.025 Uiso 1 calc . . R
 C18 C 0.31298(14) 0.00475(17) -0.28229(11) 0.0185(3) Uani 1 d . . .
 C19 C -0.26556(15) -0.58702(18) -0.29899(12) 0.0221(3) Uani 1 d . . .
 H19A H -0.3335 -0.6790 -0.3228 0.026 Uiso 1 calc . . R
 H19B H -0.1678 -0.6339 -0.2690 0.026 Uiso 1 calc . . R
 C20 C -0.17495(15) -0.20530(17) 0.02753(11) 0.0219(3) Uani 1 d . . .
 H20A H -0.0696 -0.2299 0.0452 0.026 Uiso 1 calc . . R
 H20B H -0.1993 -0.1622 0.0964 0.026 Uiso 1 calc . . R
 C21 C -0.26198(16) -0.36624(18) -0.00779(12) 0.0229(3) Uani 1 d . . .
 H21A H -0.2466 -0.4397 0.0580 0.028 Uiso 1 calc . . R
 H21B H -0.3669 -0.3396 -0.0294 0.028 Uiso 1 calc . . R
 C22 C -0.20850(14) -0.07158(17) -0.06612(11) 0.0182(3) Uani 1 d . . .
 H22 H -0.3139 -0.0783 -0.1046 0.022 Uiso 1 calc . . R
 C23 C -0.22065(15) -0.45794(17) -0.10516(12) 0.0210(3) Uani 1 d . . .
 H23 H -0.1223 -0.4911 -0.0952 0.025 Uiso 1 calc . . R
 C24 C -0.29604(18) 0.1581(2) 0.02398(13) 0.0296(3) Uani 1 d . . .
 H24A H -0.3808 0.1772 -0.0378 0.044 Uiso 1 calc . . GR
 H24B H -0.2654 0.2612 0.0627 0.044 Uiso 1 calc . . GR
 H24C H -0.3217 0.0801 0.0769 0.044 Uiso 1 calc . . GR
 C1A C -0.40405(15) -0.39451(19) -0.45837(12) 0.0238(3) Uani 1 d . . .
 H1AA H -0.4316 -0.3221 -0.4031 0.036 Uiso 1 calc . . GR
 H1AB H -0.4809 -0.4754 -0.4837 0.036 Uiso 1 calc . . GR
 H1AC H -0.3906 -0.3302 -0.5227 0.036 Uiso 1 calc . . GR

loop_
  _atom_site_aniso_label
  _atom_site_aniso_U_11
  _atom_site_aniso_U_22
  _atom_site_aniso_U_33
  _atom_site_aniso_U_23
  _atom_site_aniso_U_13
  _atom_site_aniso_U_12
 O1 0.0144(4) 0.0194(5) 0.0228(5) -0.0027(4) 0.0052(3) -0.0017(4)
 O2 0.0185(5) 0.0198(5) 0.0329(6) -0.0009(4) 0.0066(4) 0.0037(4)
 O3 0.0207(5) 0.0194(5) 0.0280(5) -0.0034(4) 0.0076(4) 0.0012(4)
 O4 0.0163(4) 0.0245(5) 0.0287(5) -0.0041(4) 0.0075(4) -0.0041(4)
 O5 0.0144(4) 0.0269(5) 0.0236(5) 0.0022(4) 0.0048(3) 0.0024(4)
 C6 0.0155(6) 0.0199(6) 0.0152(6) -0.0008(5) 0.0052(5) -0.0006(5)
 O7 0.0269(5) 0.0225(5) 0.0268(5) -0.0045(4) 0.0127(4) -0.0004(4)
 C8 0.0167(6) 0.0225(7) 0.0150(6) 0.0001(5) 0.0043(5) 0.0006(5)
 C9 0.0137(6) 0.0263(7) 0.0185(6) 0.0015(5) 0.0060(5) 0.0014(5)
 C10 0.0154(6) 0.0230(6) 0.0140(6) 0.0010(5) 0.0059(4) -0.0001(5)
 C11 0.0182(7) 0.0218(7) 0.0165(6) 0.0015(5) 0.0062(5) 0.0023(5)
 C12 0.0180(6) 0.0194(6) 0.0189(6) -0.0002(5) 0.0071(5) 0.0005(5)
 C13 0.0147(6) 0.0208(6) 0.0201(6) -0.0004(5) 0.0059(5) 0.0006(5)
 C14 0.0156(6) 0.0135(6) 0.0207(6) -0.0013(5) 0.0050(5) -0.0014(4)
 C15 0.0165(6) 0.0198(6) 0.0186(6) 0.0014(5) 0.0055(5) 0.0015(5)
 C16 0.0172(6) 0.0202(6) 0.0225(6) -0.0057(5) 0.0045(5) -0.0045(5)
 C17 0.0186(6) 0.0207(7) 0.0237(7) 0.0028(5) 0.0069(5) -0.0011(5)
 C18 0.0178(6) 0.0234(7) 0.0156(6) -0.0010(5) 0.0064(5) -0.0037(5)
 C19 0.0204(6) 0.0207(6) 0.0254(7) -0.0021(6) 0.0059(5) -0.0024(5)
 C20 0.0228(6) 0.0256(7) 0.0178(6) 0.0001(5) 0.0058(5) 0.0012(6)
 C21 0.0246(7) 0.0234(7) 0.0222(7) 0.0026(5) 0.0083(5) -0.0012(6)
 C22 0.0163(6) 0.0200(6) 0.0191(6) -0.0015(5) 0.0060(5) 0.0001(5)
 C23 0.0205(6) 0.0187(6) 0.0247(7) 0.0036(5) 0.0067(5) 0.0006(5)
 C24 0.0380(8) 0.0273(8) 0.0284(8) -0.0014(6) 0.0176(6) 0.0073(7)
 C1A 0.0176(6) 0.0316(8) 0.0213(7) -0.0036(6) 0.0023(5) -0.0020(6)

_geom_special_details
;
 All esds (except the esd in the dihedral angle between two l.s. planes) 
 are estimated using the full covariance matrix.  The cell esds are taken 
 into account individually in the estimation of esds in distances, angles 
 and torsion angles; correlations between esds in cell parameters are only 
 used when they are defined by crystal symmetry.  An approximate (isotropic) 
 treatment of cell esds is used for estimating esds involving l.s. planes. 
;
loop_
  _geom_bond_atom_site_label_1
  _geom_bond_atom_site_label_2
  _geom_bond_distance
  _geom_bond_site_symmetry_2
  _geom_bond_publ_flag
 O1 C8 1.3318(16) . ?
 O1 C16 1.4759(15) . ?
 O2 H2 0.8200 . ?
 O2 C11 1.3472(17) . ?
 O3 C8 1.2319(17) . ?
 O4 H4 0.8200 . ?
 O4 C18 1.3567(16) . ?
 O5 C14 1.2173(15) . ?
 C6 C8 1.4725(18) . ?
 C6 C10 1.4293(19) . ?
 C6 C11 1.4197(17) . ?
 O7 C22 1.4323(17) . ?
 O7 C24 1.4204(17) . ?
 C9 H9 0.9300 . ?
 C9 C11 1.3915(19) . ?
 C9 C18 1.381(2) . ?
 C10 C12 1.3842(18) . ?
 C10 C15 1.5140(17) . ?
 C12 H12 0.9300 . ?
 C12 C18 1.4018(18) . ?
 C13 H13A 0.9700 . ?
 C13 H13B 0.9700 . ?
 C13 C14 1.5075(18) . ?
 C13 C22 1.5241(17) . ?
 C14 C15 1.5185(17) . ?
 C15 H15A 0.9700 . ?
 C15 H15B 0.9700 . ?
 C16 H16 0.9800 . ?
 C16 C19 1.526(2) . ?
 C16 C1A 1.5140(19) . ?
 C17 H17 0.9300 . ?
 C17 C19 1.5042(19) . ?
 C17 C23 1.324(2) . ?
 C19 H19A 0.9700 . ?
 C19 H19B 0.9700 . ?
 C20 H20A 0.9700 . ?
 C20 H20B 0.9700 . ?
 C20 C21 1.5308(19) . ?
 C20 C22 1.5340(18) . ?
 C21 H21A 0.9700 . ?
 C21 H21B 0.9700 . ?
 C21 C23 1.5036(19) . ?
 C22 H22 0.9800 . ?
 C23 H23 0.9300 . ?
 C24 H24A 0.9600 . ?
 C24 H24B 0.9600 . ?
 C24 H24C 0.9600 . ?
 C1A H1AA 0.9600 . ?
 C1A H1AB 0.9600 . ?
 C1A H1AC 0.9600 . ?

loop_
  _geom_angle_atom_site_label_1
  _geom_angle_atom_site_label_2
  _geom_angle_atom_site_label_3
  _geom_angle
  _geom_angle_site_symmetry_1
  _geom_angle_site_symmetry_3
  _geom_angle_publ_flag
 C8 O1 C16 117.41(10) . . ?
 C11 O2 H2 109.5 . . ?
 C18 O4 H4 109.5 . . ?
 C10 C6 C8 125.34(11) . . ?
 C11 C6 C8 116.98(11) . . ?
 C11 C6 C10 117.67(11) . . ?
 C24 O7 C22 112.61(11) . . ?
 O1 C8 C6 114.83(11) . . ?
 O3 C8 O1 121.91(12) . . ?
 O3 C8 C6 123.26(11) . . ?
 C11 C9 H9 120.2 . . ?
 C18 C9 H9 120.2 . . ?
 C18 C9 C11 119.63(12) . . ?
 C6 C10 C15 124.21(12) . . ?
 C12 C10 C6 119.81(11) . . ?
 C12 C10 C15 115.97(12) . . ?
 O2 C11 C6 122.76(12) . . ?
 O2 C11 C9 115.70(12) . . ?
 C9 C11 C6 121.52(12) . . ?
 C10 C12 H12 119.5 . . ?
 C10 C12 C18 120.98(12) . . ?
 C18 C12 H12 119.5 . . ?
 H13A C13 H13B 107.6 . . ?
 C14 C13 H13A 108.6 . . ?
 C14 C13 H13B 108.6 . . ?
 C14 C13 C22 114.46(10) . . ?
 C22 C13 H13A 108.6 . . ?
 C22 C13 H13B 108.6 . . ?
 O5 C14 C13 122.18(11) . . ?
 O5 C14 C15 118.40(11) . . ?
 C13 C14 C15 119.41(10) . . ?
 C10 C15 C14 117.62(10) . . ?
 C10 C15 H15A 107.9 . . ?
 C10 C15 H15B 107.9 . . ?
 C14 C15 H15A 107.9 . . ?
 C14 C15 H15B 107.9 . . ?
 H15A C15 H15B 107.2 . . ?
 O1 C16 H16 109.0 . . ?
 O1 C16 C19 110.19(10) . . ?
 O1 C16 C1A 104.71(11) . . ?
 C19 C16 H16 109.0 . . ?
 C1A C16 H16 109.0 . . ?
 C1A C16 C19 114.89(11) . . ?
 C19 C17 H17 118.2 . . ?
 C23 C17 H17 118.2 . . ?
 C23 C17 C19 123.54(12) . . ?
 O4 C18 C9 122.47(12) . . ?
 O4 C18 C12 117.17(13) . . ?
 C9 C18 C12 120.36(12) . . ?
 C16 C19 H19A 108.4 . . ?
 C16 C19 H19B 108.4 . . ?
 C17 C19 C16 115.38(12) . . ?
 C17 C19 H19A 108.4 . . ?
 C17 C19 H19B 108.4 . . ?
 H19A C19 H19B 107.5 . . ?
 H20A C20 H20B 107.8 . . ?
 C21 C20 H20A 109.1 . . ?
 C21 C20 H20B 109.1 . . ?
 C21 C20 C22 112.56(11) . . ?
 C22 C20 H20A 109.1 . . ?
 C22 C20 H20B 109.1 . . ?
 C20 C21 H21A 108.6 . . ?
 C20 C21 H21B 108.6 . . ?
 H21A C21 H21B 107.6 . . ?
 C23 C21 C20 114.66(11) . . ?
 C23 C21 H21A 108.6 . . ?
 C23 C21 H21B 108.6 . . ?
 O7 C22 C13 105.45(10) . . ?
 O7 C22 C20 111.94(11) . . ?
 O7 C22 H22 108.6 . . ?
 C13 C22 C20 113.55(11) . . ?
 C13 C22 H22 108.6 . . ?
 C20 C22 H22 108.6 . . ?
 C17 C23 C21 125.52(13) . . ?
 C17 C23 H23 117.2 . . ?
 C21 C23 H23 117.2 . . ?
 O7 C24 H24A 109.5 . . ?
 O7 C24 H24B 109.5 . . ?
 O7 C24 H24C 109.5 . . ?
 H24A C24 H24B 109.5 . . ?
 H24A C24 H24C 109.5 . . ?
 H24B C24 H24C 109.5 . . ?
 C16 C1A H1AA 109.5 . . ?
 C16 C1A H1AB 109.5 . . ?
 C16 C1A H1AC 109.5 . . ?
 H1AA C1A H1AB 109.5 . . ?
 H1AA C1A H1AC 109.5 . . ?
 H1AB C1A H1AC 109.5 . . ?

loop_
  _geom_torsion_atom_site_label_1
  _geom_torsion_atom_site_label_2
  _geom_torsion_atom_site_label_3
  _geom_torsion_atom_site_label_4
  _geom_torsion
  _geom_torsion_site_symmetry_1
  _geom_torsion_site_symmetry_2
  _geom_torsion_site_symmetry_3
  _geom_torsion_site_symmetry_4
  _geom_torsion_publ_flag
 O1 C16 C19 C17 62.23(14) . . . . ?
 O5 C14 C15 C10 -173.87(12) . . . . ?
 C6 C10 C12 C18 -0.43(19) . . . . ?
 C6 C10 C15 C14 79.18(16) . . . . ?
 C8 O1 C16 C19 80.61(13) . . . . ?
 C8 O1 C16 C1A -155.31(11) . . . . ?
 C8 C6 C10 C12 177.69(12) . . . . ?
 C8 C6 C10 C15 -3.7(2) . . . . ?
 C8 C6 C11 O2 1.52(18) . . . . ?
 C8 C6 C11 C9 -176.87(12) . . . . ?
 C10 C6 C8 O1 -6.52(18) . . . . ?
 C10 C6 C8 O3 174.44(12) . . . . ?
 C10 C6 C11 O2 -179.36(12) . . . . ?
 C10 C6 C11 C9 2.25(18) . . . . ?
 C10 C12 C18 O4 -178.90(11) . . . . ?
 C10 C12 C18 C9 1.40(19) . . . . ?
 C11 C6 C8 O1 172.52(11) . . . . ?
 C11 C6 C8 O3 -6.52(19) . . . . ?
 C11 C6 C10 C12 -1.34(18) . . . . ?
 C11 C6 C10 C15 177.25(11) . . . . ?
 C11 C9 C18 O4 179.81(11) . . . . ?
 C11 C9 C18 C12 -0.50(19) . . . . ?
 C12 C10 C15 C14 -102.18(14) . . . . ?
 C13 C14 C15 C10 6.87(18) . . . . ?
 C14 C13 C22 O7 -88.23(12) . . . . ?
 C14 C13 C22 C20 148.86(11) . . . . ?
 C15 C10 C12 C18 -179.13(11) . . . . ?
 C16 O1 C8 O3 -4.42(18) . . . . ?
 C16 O1 C8 C6 176.52(10) . . . . ?
 C18 C9 C11 O2 -179.84(12) . . . . ?
 C18 C9 C11 C6 -1.35(19) . . . . ?
 C19 C17 C23 C21 179.78(13) . . . . ?
 C20 C21 C23 C17 -121.46(15) . . . . ?
 C21 C20 C22 O7 156.48(11) . . . . ?
 C21 C20 C22 C13 -84.26(14) . . . . ?
 C22 C13 C14 O5 -10.08(18) . . . . ?
 C22 C13 C14 C15 169.15(11) . . . . ?
 C22 C20 C21 C23 65.98(15) . . . . ?
 C23 C17 C19 C16 -108.82(15) . . . . ?
 C24 O7 C22 C13 153.71(11) . . . . ?
 C24 O7 C22 C20 -82.35(13) . . . . ?
 C1A C16 C19 C17 -55.73(15) . . . . ?
